# Supplementary material for: A bench-top Dark-Root device built with LEGO® bricks enables a non-invasive plant root development analysis in soil conditions mirroring nature
Source: Front Plant Sci. 2023 May 31;14:1166511. doi: 10.3389/fpls.2023.1166511 (PMC10264708; doi:10.3389/fpls.2023.1166511)
Supplement: Supplementary Table 2 — The ID numbers and the quantity of all used LEGO® bricks to set up the different BIBLOXes. The corresponding rendered BIBLOXes are available in Supplemental Data 3. [file Table_2.xlsx]

## Sheet: BIBLOX Lego part list
BIBLOX Lego part list:
	BIBLOX for single rhizobox (for filming):												BIBLOX for 3 rhizoboxes (for filming); 2 with lid -> dark, 1 without lid -> light												BIBLOX for 3 rhizoboxes (for filming); 3 with lid -> dark												BIBLOX for 14 rhizoboxes (dark) (for sampling); part lid (rest not needed because covered by rhizoboxes)												LEGO scaffold for 6 rhizoboxes (light) (for sampling)
	BLItemNo	ElementId	LdrawId	PartName	BLColorId	LDrawColorId	ColorName	ColorCategory	Qty	Weight			BLItemNo	ElementId	LdrawId	PartName	BLColorId	LDrawColorId	ColorName	ColorCategory	Qty	Weight			BLItemNo	ElementId	LdrawId	PartName	BLColorId	LDrawColorId	ColorName	ColorCategory	Qty	Weight			BLItemNo	ElementId	LdrawId	PartName	BLColorId	LDrawColorId	ColorName	ColorCategory	Qty	Weight			BLItemNo
	2420	242026	2420	Plate 2 x 2 Corner	11	0	Black	Solid Colors	2	0.54			2420	242026	2420	Plate 2 x 2 Corner	11	0	Black	Solid Colors	4	0.54			2420	242026	2420	Plate 2 x 2 Corner	11	0	Black	Solid Colors	6	0.54			2456	4181144	2456	Brick 2 x 6	11	0	Black	Solid Colors	98	3.74			2456
	2445	244526	2445	Plate 2 x 12	11	0	Black	Solid Colors	3	3.5			2445	244526	2445	Plate 2 x 12	11	0	Black	Solid Colors	6	3.5			2445	244526	2445	Plate 2 x 12	11	0	Black	Solid Colors	9	3.5			3001	300126	3001	Brick 2 x 4	11	0	Black	Solid Colors	726	2.32			2465
	2456	4181144	2456	Brick 2 x 6	11	0	Black	Solid Colors	49	3.74			2456	4181144	2456	Brick 2 x 6	11	0	Black	Solid Colors	147	3.74			2456	4181144	2456	Brick 2 x 6	11	0	Black	Solid Colors	147	3.74			3002	300226	3002	Brick 2 x 3	11	0	Black	Solid Colors	396	1.92			3001
	3001	300126	3001	Brick 2 x 4	11	0	Black	Solid Colors	366	2.32			3001	300126	3001	Brick 2 x 4	11	0	Black	Solid Colors	1098	2.32			3001	300126	3001	Brick 2 x 4	11	0	Black	Solid Colors	1098	2.32			3003	300326	3003	Brick 2 x 2	11	0	Black	Solid Colors	364	1.35			3002
	3002	300226	3002	Brick 2 x 3	11	0	Black	Solid Colors	195	1.92			3002	300226	3002	Brick 2 x 3	11	0	Black	Solid Colors	585	1.92			3002	300226	3002	Brick 2 x 3	11	0	Black	Solid Colors	585	1.92			3006	4617860	3006	Brick 2 x 10	11	0	Black	Solid Colors	42	5.75			32278
	3003	300326	3003	Brick 2 x 2	11	0	Black	Solid Colors	179	1.35			3003	300326	3003	Brick 2 x 2	11	0	Black	Solid Colors	537	1.35			3003	300326	3003	Brick 2 x 2	11	0	Black	Solid Colors	537	1.35			3007	6037390	3007	Brick 2 x 8	11	0	Black	Solid Colors	38	4.75			3666
	3006	4617860	3006	Brick 2 x 10	11	0	Black	Solid Colors	21	5.75			3006	4617860	3006	Brick 2 x 10	11	0	Black	Solid Colors	63	5.75			3006	4617860	3006	Brick 2 x 10	11	0	Black	Solid Colors	63	5.75			3022	302226	3022	Plate 2 x 2	11	0	Black	Solid Colors	6	0.64			3673
	3007	6037390	3007	Brick 2 x 8	11	0	Black	Solid Colors	20	4.75			3007	6037390	3007	Brick 2 x 8	11	0	Black	Solid Colors	60	4.75			3007	6037390	3007	Brick 2 x 8	11	0	Black	Solid Colors	60	4.75			3028	302826	3028	Plate 6 x 12	11	0	Black	Solid Colors	2	9.47			3700
	3020	302026	3020	Plate 2 x 4	11	0	Black	Solid Colors	9	1.2			3020	302026	3020	Plate 2 x 4	11	0	Black	Solid Colors	18	1.2			3020	302026	3020	Plate 2 x 4	11	0	Black	Solid Colors	27	1.2			3029	302926	3029	Plate 4 x 12	11	0	Black	Solid Colors	4	6.76			4186a
	3021	302126	3021	Plate 2 x 3	11	0	Black	Solid Colors	9	0.93			3021	302126	3021	Plate 2 x 3	11	0	Black	Solid Colors	18	0.93			3021	302126	3021	Plate 2 x 3	11	0	Black	Solid Colors	27	0.93			3036	303626	3036	Plate 6 x 8	11	0	Black	Solid Colors	4	6.4
	3022	302226	3022	Plate 2 x 2	11	0	Black	Solid Colors	3	0.64			3022	302226	3022	Plate 2 x 2	11	0	Black	Solid Colors	6	0.64			3022	302226	3022	Plate 2 x 2	11	0	Black	Solid Colors	9	0.64			3065		3065	Brick 1 x 2 without Bottom Tube	11	0	Black	Solid Colors	16	0.82			Total qty
	3028	302826	3028	Plate 6 x 12	11	0	Black	Solid Colors	1	9.47			3028	302826	3028	Plate 6 x 12	11	0	Black	Solid Colors	2	9.47			3028	302826	3028	Plate 6 x 12	11	0	Black	Solid Colors	3	9.47			32278	4542573	32278	Technic, Liftarm Thick 1 x 15	11	0	Black	Solid Colors	8	4			184
	3029	302926	3029	Plate 4 x 12	11	0	Black	Solid Colors	2	6.76			3029	302926	3029	Plate 4 x 12	11	0	Black	Solid Colors	4	6.76			3029	302926	3029	Plate 4 x 12	11	0	Black	Solid Colors	6	6.76			3623	362326	3623	Plate 1 x 3	11	0	Black	Solid Colors	2	0.53
	3031	4243819	3031	Plate 4 x 4	11	0	Black	Solid Colors	4	2.22			3031	4243819	3031	Plate 4 x 4	11	0	Black	Solid Colors	8	2.22			3031	4243819	3031	Plate 4 x 4	11	0	Black	Solid Colors	12	2.22			3673		3673	Technic, Pin without Friction Ridges	11	0	Black	Solid Colors	16	0.16
	3032	303226	3032	Plate 4 x 6	11	0	Black	Solid Colors	5	3.3			3032	303226	3032	Plate 4 x 6	11	0	Black	Solid Colors	10	3.3			3032	303226	3032	Plate 4 x 6	11	0	Black	Solid Colors	15	3.3			3700	370026	3700	Technic, Brick 1 x 2 with Hole	11	0	Black	Solid Colors	16	0.82
	3033	303326	3033	Plate 6 x 10	11	0	Black	Solid Colors	1	7.95			3033	303326	3033	Plate 6 x 10	11	0	Black	Solid Colors	2	7.95			3033	303326	3033	Plate 6 x 10	11	0	Black	Solid Colors	3	7.95			3795	379526	3795	Plate 2 x 6	11	0	Black	Solid Colors	2	1.74
	3034	303426	3034	Plate 2 x 8	11	0	Black	Solid Colors	6	2.27			3034	303426	3034	Plate 2 x 8	11	0	Black	Solid Colors	12	2.27			3034	303426	3034	Plate 2 x 8	11	0	Black	Solid Colors	18	2.27			3832	383226	3832	Plate 2 x 10	11	0	Black	Solid Colors	6	2.91
	3035	303526	3035	Plate 4 x 8	11	0	Black	Solid Colors	3	4.7			3035	303526	3035	Plate 4 x 8	11	0	Black	Solid Colors	6	4.7			3035	303526	3035	Plate 4 x 8	11	0	Black	Solid Colors	9	4.7			4186a		4186a	Baseplate 50 x 50	85	72	Dark Bluish Gray	Solid Colors	1	235
	3036	303626	3036	Plate 6 x 8	11	0	Black	Solid Colors	5	6.4			3036	303626	3036	Plate 6 x 8	11	0	Black	Solid Colors	10	6.4			3036	303626	3036	Plate 6 x 8	11	0	Black	Solid Colors	15	6.4
	3065		3065	Brick 1 x 2 without Bottom Tube	11	0	Black	Solid Colors	4	0.82			3065		3065	Brick 1 x 2 without Bottom Tube	11	0	Black	Solid Colors	12	0.82			3065		3065	Brick 1 x 2 without Bottom Tube	11	0	Black	Solid Colors	12	0.82			Total qty	Total Weight
	32278	4542573	32278	Technic, Liftarm Thick 1 x 15	11	0	Black	Solid Colors	2	4			32278	4542573	32278	Technic, Liftarm Thick 1 x 15	11	0	Black	Solid Colors	6	4			32278	4542573	32278	Technic, Liftarm Thick 1 x 15	11	0	Black	Solid Colors	6	4			1747	4117.78
	3460	346026	3460	Plate 1 x 8	11	0	Black	Solid Colors	2	1.36			3460	346026	3460	Plate 1 x 8	11	0	Black	Solid Colors	4	1.36			3460	346026	3460	Plate 1 x 8	11	0	Black	Solid Colors	6	1.36
	3623	362326	3623	Plate 1 x 3	11	0	Black	Solid Colors	3	0.53			3623	362326	3623	Plate 1 x 3	11	0	Black	Solid Colors	6	0.53			3623	362326	3623	Plate 1 x 3	11	0	Black	Solid Colors	9	0.53
	3666	366626	3666	Plate 1 x 6	11	0	Black	Solid Colors	1	1.06			3666	366626	3666	Plate 1 x 6	11	0	Black	Solid Colors	2	1.06			3666	366626	3666	Plate 1 x 6	11	0	Black	Solid Colors	3	1.06
	3673		3673	Technic, Pin without Friction Ridges	11	0	Black	Solid Colors	4	0.16			3673		3673	Technic, Pin without Friction Ridges	11	0	Black	Solid Colors	12	0.16			3673		3673	Technic, Pin without Friction Ridges	11	0	Black	Solid Colors	12	0.16
	3700	370026	3700	Technic, Brick 1 x 2 with Hole	11	0	Black	Solid Colors	4	0.82			3700	370026	3700	Technic, Brick 1 x 2 with Hole	11	0	Black	Solid Colors	12	0.82			3700	370026	3700	Technic, Brick 1 x 2 with Hole	11	0	Black	Solid Colors	12	0.82
	3710	371026	3710	Plate 1 x 4	11	0	Black	Solid Colors	3	0.71			3710	371026	3710	Plate 1 x 4	11	0	Black	Solid Colors	6	0.71			3710	371026	3710	Plate 1 x 4	11	0	Black	Solid Colors	9	0.71
	3795	379526	3795	Plate 2 x 6	11	0	Black	Solid Colors	4	1.74			3795	379526	3795	Plate 2 x 6	11	0	Black	Solid Colors	8	1.74			3795	379526	3795	Plate 2 x 6	11	0	Black	Solid Colors	12	1.74
	3832	383226	3832	Plate 2 x 10	11	0	Black	Solid Colors	7	2.91			3832	383226	3832	Plate 2 x 10	11	0	Black	Solid Colors	14	2.91			3832	383226	3832	Plate 2 x 10	11	0	Black	Solid Colors	21	2.91
	3958	395826	3958	Plate 6 x 6	11	0	Black	Solid Colors	3	4.71			3958	395826	3958	Plate 6 x 6	11	0	Black	Solid Colors	6	4.71			3958	395826	3958	Plate 6 x 6	11	0	Black	Solid Colors	9	4.71
	4186a		4186a	Baseplate 50 x 50	85	72	Dark Bluish Gray	Solid Colors	1	235			4186a		4186a	Baseplate 50 x 50	85	72	Dark Bluish Gray	Solid Colors	2	235			4186a		4186a	Baseplate 50 x 50	85	72	Dark Bluish Gray	Solid Colors	2	235
	Total qty	Total Weight											Total qty	Total Weight											Total qty	Total Weight
	921	2312.05											2686	6503.48											2762	6701.15
[truncated: 9 more columns]
